# Supplementary material for: Design, Synthesis, and Biological Evaluation of Novel Dihydropyridine and Pyridine Analogs as Potent Human Tissue Nonspecific Alkaline Phosphatase Inhibitors with Anticancer Activity: ROS and DNA Damage-Induced Apoptosis
Source: MDPI journal article supplement (doi:10.3390/molecules27196235), 2022-09-22
Supplement: s1 [file s1]

## **Supporting Information**

### **Design, Synthesis and Biological Evaluation of Novel Dihydropyridine and Pyridine Analogs as Potent Human Tissue Nonspecific Alkaline Phosphatase Inhibitors with Anticancer Activity: ROS and DNA Damage-Induced Apoptosis**

Nazeer Ahmad Khan<sup>1</sup>, Faisal Rashid<sup>2</sup>, Muhammad Siraj Khan Jadoon<sup>2</sup>, Saquib Jalil<sup>2</sup>, Zulfikar Ali Khan<sup>3</sup>, Raha Orfali<sup>4</sup>, Shagufta Perveen<sup>5</sup>, Areej Al-Taweel<sup>4</sup>, Jamshed Iqbal<sup>2</sup> and Sohail Anjum Shahzad<sup>1,\*</sup>

<sup>1</sup>Department of Chemistry, COMSATS University Islamabad, Abbottabad Campus, University Road, Abbottabad 22060, Pakistan

<sup>2</sup>Centre for Advanced Drug Research, COMSATS University Islamabad, Abbottabad Campus, Abbot-tabad 22060, Pakistan

<sup>3</sup>Department of Chemistry, Government College University, Faisalabad 38000, Pakistan

<sup>4</sup>Department of Pharmacognosy, College of Pharmacy, King Saud University, P.O. Box 2457, Riyadh 11451, Saudi Arabia

<sup>5</sup>Department of Chemistry, School of Computer, Mathematical and Natural Sciences, Morgan State University, Baltimore, MD 21251, USA

\*Department of Chemistry, COMSATS University Islamabad, Abbottabad Campus, University Road, Abbottabad 22060, Pakistan (Sohail Anjum Shahzad). E-mail: sashahzad@cuiatd.edu.pk; sohail\_chem@yahoo.com (Sohail Anjum Shahzad).

# HPLC Analysis Report

## <Sample Information>

Sample Name : NAK 45-6  
Sample ID : NAK 45-6  
Data Filename : NAK 45-6 Data1.lcd  
Method Filename : NAK 43-2.lcm  
Batch Filename :

Vial # : 1-1  
Injection Volume : 20 uL  
Date Acquired : 01-Sep-22 3:48:46 PM  
Date Processed : 01-Sep-22 4:13:52 PM

Sample Type : Unknown

Acquired by : System Administrator  
Processed by : System Administrator

## <Chromatogram>

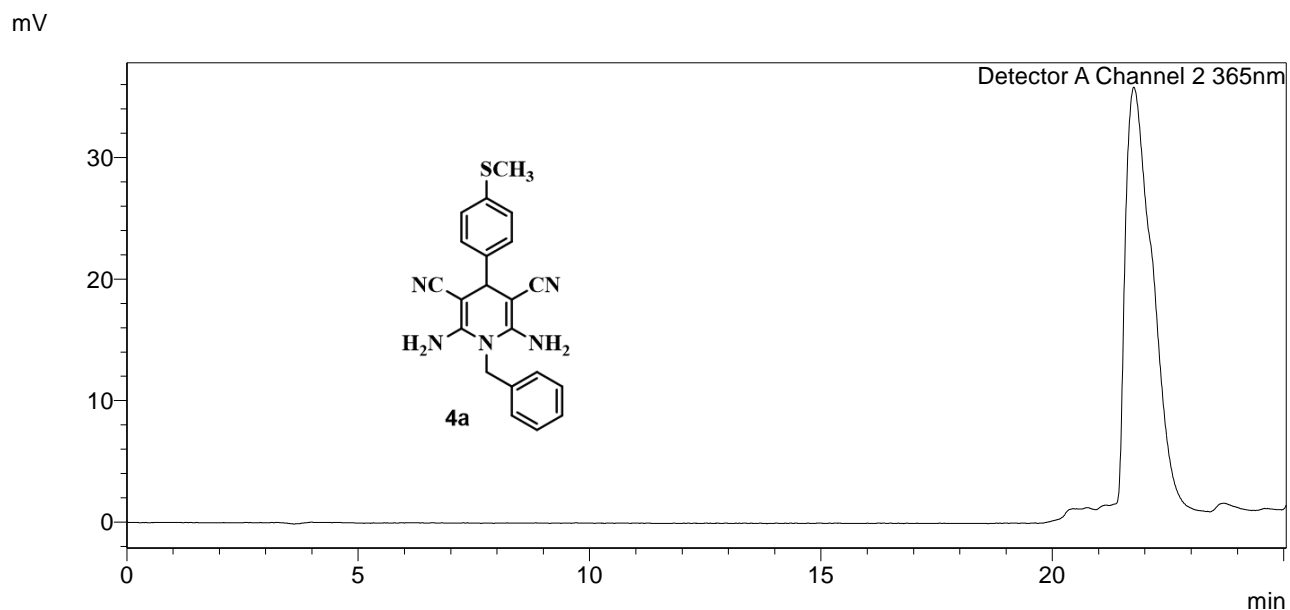

## Detector A Channel 2 365nm

| Peak# | Ret. Time | Area    | Height | Conc. | Unit | Mark | Name |
|-------|-----------|---------|--------|-------|------|------|------|
| 1     | 3.989     | 2019    | 147    | 0.000 |      |      |      |
| 2     | 4.260     | 1221    | 122    | 0.000 |      | V    |      |
| 3     | 4.495     | 1676    | 114    | 0.000 |      | V    |      |
| 4     | 4.835     | 1070    | 92     | 0.000 |      | V    |      |
| 5     | 20.452    | 18886   | 1047   | 0.000 |      |      |      |
| 6     | 20.533    | 4547    | 1020   | 0.000 |      | V    |      |
| 7     | 20.755    | 21756   | 1076   | 0.000 |      | V    |      |
| 8     | 21.159    | 19113   | 1193   | 0.000 |      | V    |      |
| 9     | 21.761    | 1482871 | 35436  | 0.000 |      | SV   |      |
| 10    | 23.714    | 17902   | 670    | 0.000 |      | T    |      |
| 11    | 24.581    | 1165    | 150    | 0.000 |      | TV   |      |
| 12    | 24.650    | 1223    | 139    | 0.000 |      | TV   |      |
| Total |           | 1573449 | 41207  |       |      |      |      |

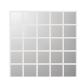SHIMADZU  
LabSolutions

# Analysis Report

## <Sample Information>

Sample Name : NAK 48-29  
Sample ID : NAK 48-29  
Data Filename : NAK 48-29 Data1.lcd  
Method Filename : NAK 48-20.lcm  
Batch Filename :  
Vial # : 1-1  
Injection Volume : 20 uL  
Date Acquired : 03-Sep-22 7:35:09 PM  
Date Processed : 03-Sep-22 8:10:19 PM

Sample Type : Unknown  
Acquired by : System Administrator  
Processed by : System Administrator

## <Chromatogram>

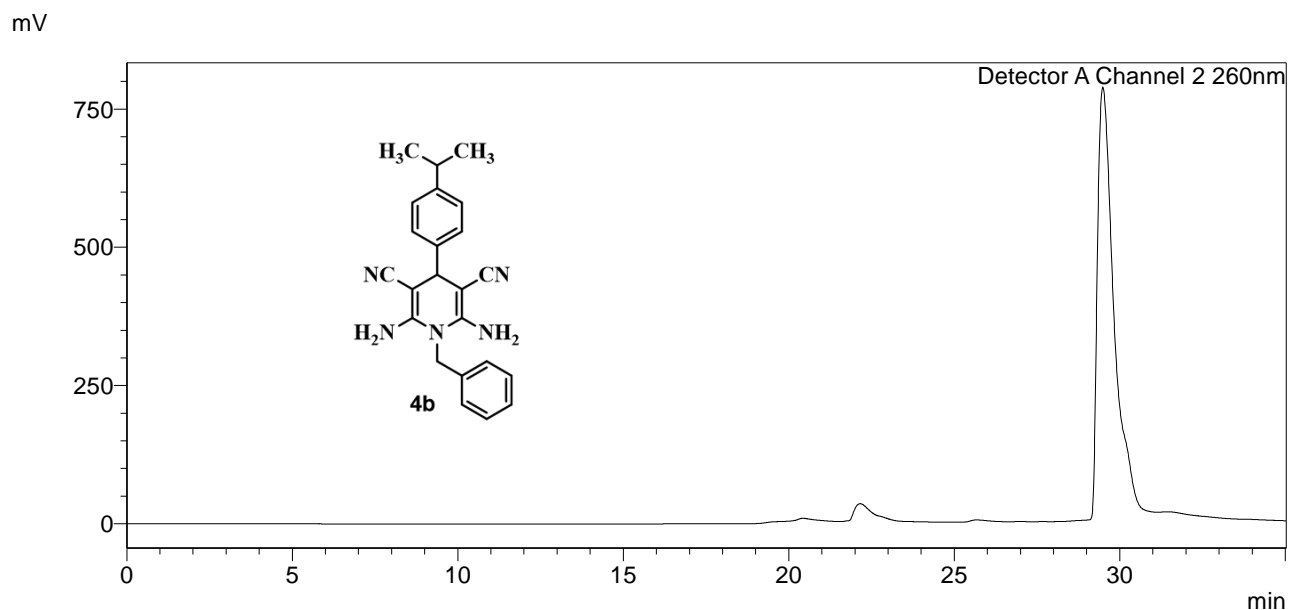

## Detector A Channel 2 260nm

| Peak# | Ret. Time | Area     | Height | Conc. | Unit | Mark | Name |
|-------|-----------|----------|--------|-------|------|------|------|
| 1     | 3.460     | 8031     | 308    | 0.000 |      | V    |      |
| 2     | 3.942     | 1300     | 91     | 0.000 |      | V    |      |
| 3     | 20.432    | 700312   | 9319   | 0.000 |      |      |      |
| 4     | 22.158    | 1752917  | 35176  | 0.000 |      | SV   |      |
| 5     | 25.671    | 209942   | 4602   | 0.000 |      | V    |      |
| 6     | 26.971    | 46559    | 1227   | 0.000 |      | V    |      |
| 7     | 27.670    | 24679    | 870    | 0.000 |      | V    |      |
| 8     | 29.487    | 30089281 | 785967 | 0.000 |      | SV   |      |
| 9     | 31.470    | 105736   | 2576   | 0.000 |      | T    |      |
| Total |           | 32938755 | 840135 |       |      |      |      |

SHIMADZU  
LabSolutions

# Analysis Report

## <Sample Information>

Sample Name : NAK 46-8  
Sample ID : NAK 46-8  
Data Filename : NAK 46-8 Data1.lcd  
Method Filename : NAK 43-2.lcm  
Batch Filename :

Vial # : 1-1  
Injection Volume : 20 uL  
Date Acquired : 01-Sep-22 5:11:02 PM  
Date Processed : 01-Sep-22 5:17:24 PM

Sample Type : Unknown

Acquired by : System Administrator  
Processed by : System Administrator

## <Chromatogram>

mV

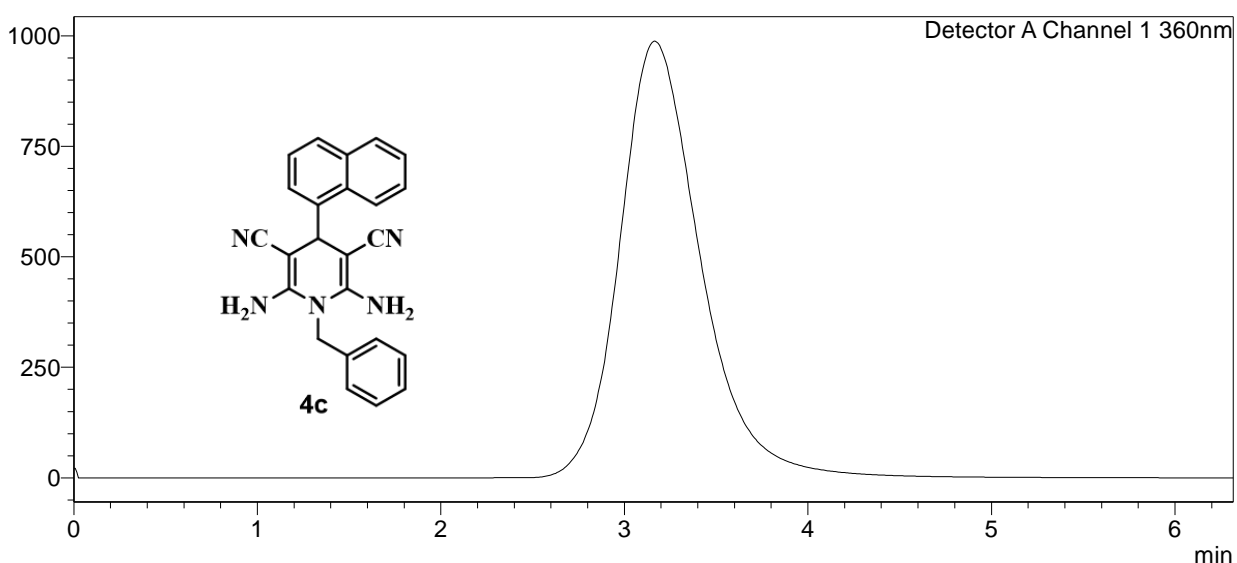

## <Peak Table>

Detector A Channel 1 360nm

| Peak# | Ret. Time | Area     | Height | Conc. | Unit | Mark | Name |
|-------|-----------|----------|--------|-------|------|------|------|
| 1     | 3.165     | 30188947 | 988256 | 0.000 |      | V    |      |
| Total |           | 30188947 | 988256 |       |      |      |      |

SHIMADZU  
LabSolutions

# Analysis Report

## <Sample Information>

Sample Name : NAK 47-16  
Sample ID : NAK 47-16  
Data Filename : NAK 47-16 Data1.lcd  
Method Filename : NAK 43-2.lcm  
Batch Filename :  
Vial # : 1-1  
Injection Volume : 10 uL  
Date Acquired : 01-Sep-22 7:03:42 PM  
Date Processed : 01-Sep-22 7:21:49 PM

Sample Type : Unknown  
Acquired by : System Administrator  
Processed by : System Administrator

## <Chromatogram>

mV

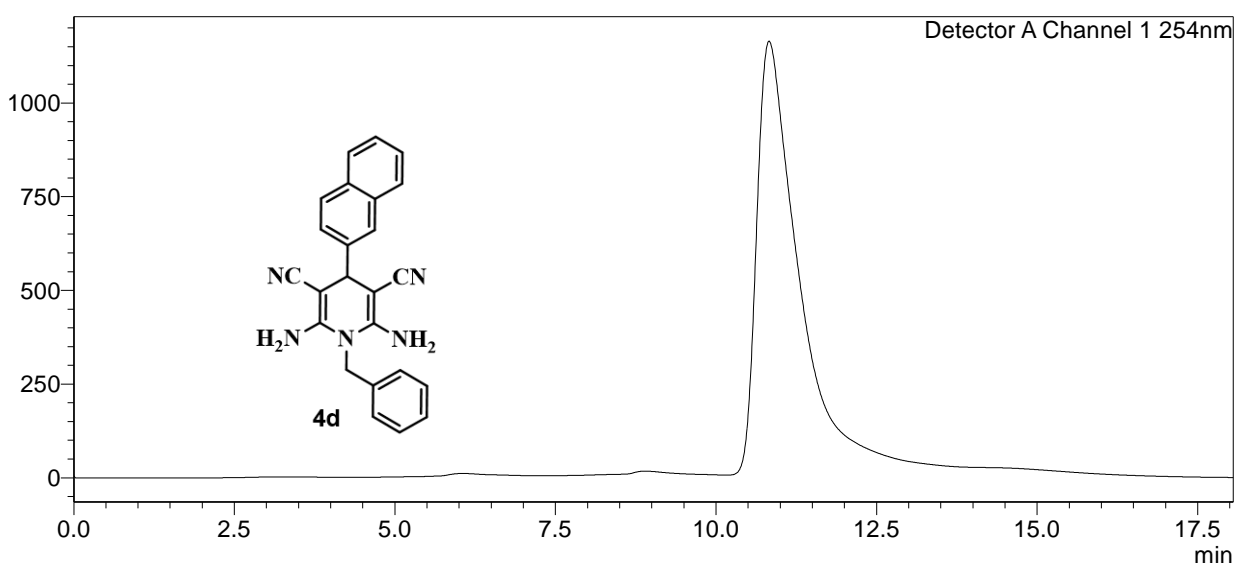

## <Peak Table>

Detector A Channel 1 254nm



| Peak# | Ret. Time | Area     | Height  | Conc. | Unit | Mark | Name |
|-------|-----------|----------|---------|-------|------|------|------|
| 1     | 3.233     | 198014   | 2364    | 0.000 |      | V    |      |
| 2     | 6.058     | 938543   | 11384   | 0.000 |      | V    |      |
| 3     | 8.897     | 1626638  | 17427   | 0.000 |      | V    |      |
| 4     | 10.826    | 59582250 | 1164738 | 0.000 |      | V    |      |
| Total |           | 62345445 | 1195914 |       |      |      |      |

SHIMADZU  
LabSolutions

# Analysis Report

## <Sample Information>

Sample Name : NAK 58-25  
Sample ID : NAK 58-25  
Data Filename : NAK 58-25 Data1.lcd  
Method Filename : NAK 48-20.lcm  
Batch Filename :  
Vial # : 1-1  
Injection Volume : 20 uL  
Date Acquired : 02-Sep-22 9:27:08 PM  
Date Processed : 02-Sep-22 10:07:18 PM

Sample Type : Unknown  
Acquired by : System Administrator  
Processed by : System Administrator

## <Chromatogram>

mV

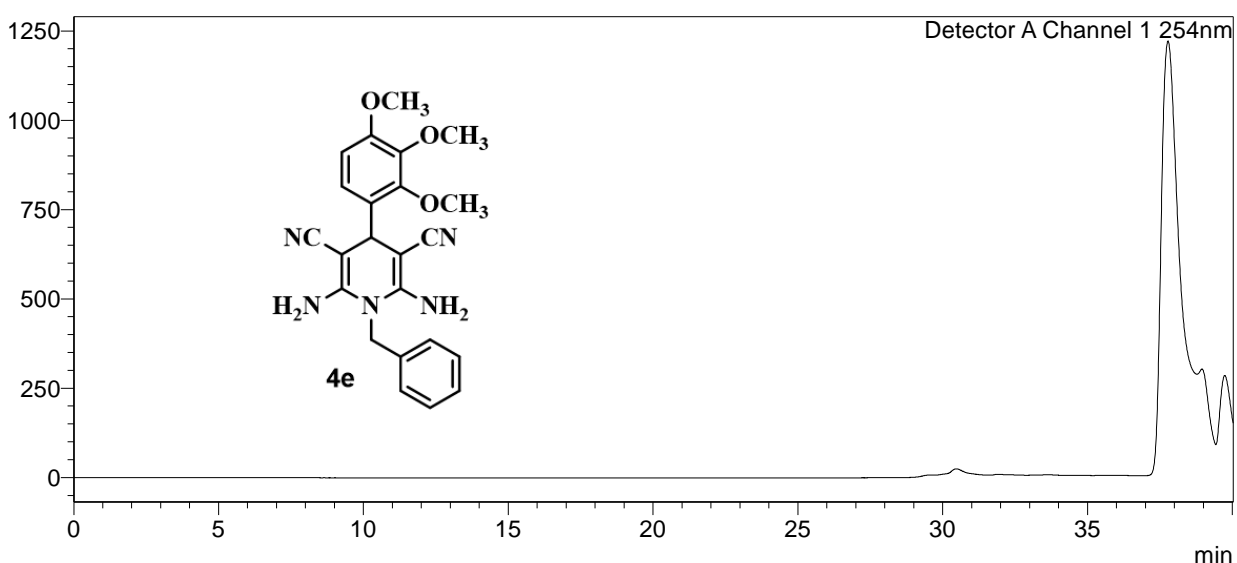

## <Peak Table>

Detector A Channel 1 254nm

| Peak# | Ret. Time | Area     | Height  | Conc. | Unit | Mark | Name |
|-------|-----------|----------|---------|-------|------|------|------|
| 1     | 3.341     | 14369    | 570     | 0.000 |      |      |      |
| 2     | 30.466    | 1398394  | 22785   | 0.000 |      |      |      |
| 3     | 31.920    | 146666   | 5755    | 0.000 |      | V    |      |
| 4     | 32.192    | 169363   | 4891    | 0.000 |      | V    |      |
| 5     | 33.170    | 58714    | 2518    | 0.000 |      | V    |      |
| 6     | 33.605    | 123002   | 3268    | 0.000 |      | V    |      |
| 7     | 35.534    | 10668    | 412     | 0.000 |      |      |      |
| 8     | 36.123    | 14248    | 442     | 0.000 |      | V    |      |
| 9     | 37.778    | 52149086 | 1191346 | 0.000 |      |      |      |
| 10    | 38.954    | 5548546  | 229285  | 0.000 |      | V    |      |
| 11    | 39.737    | 2897453  | 151755  | 0.000 |      |      |      |
| Total |           | 62530509 | 1613028 |       |      |      |      |

SHIMADZU  
LabSolutions

## Analysis Report

## &lt;Sample Information&gt;

Sample Name : NAK 43-4  
Sample ID : NAK 43-4  
Data Filename : NAK 43-4 Data1.lcd  
Method Filename : NAK 43-2.lcm  
Batch Filename :  
Vial # : 1-1  
Injection Volume : 20 uL  
Date Acquired : 01-Sep-22 1:52:18 PM  
Date Processed : 01-Sep-22 2:17:25 PM

Sample Type : Unknown  
Acquired by : System Administrator  
Processed by : System Administrator

## &lt;Chromatogram&gt;

mV

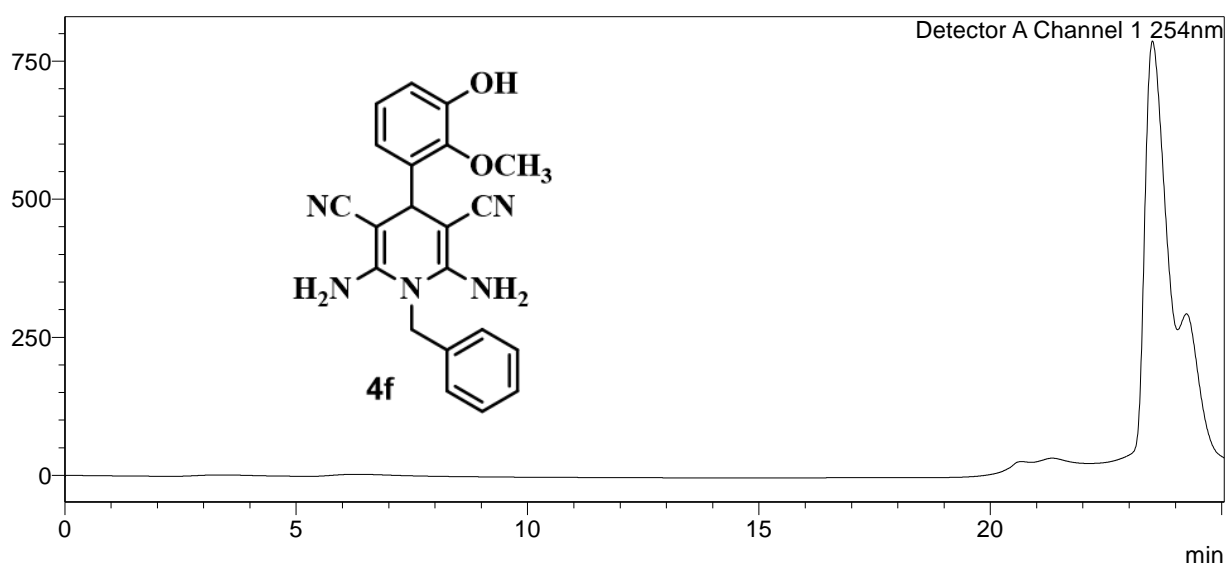

## &lt;Peak Table&gt;

Detector A Channel 1 254nm

| Peak# | Ret. Time | Area     | Height  | Conc. | Unit | Mark | Name |
|-------|-----------|----------|---------|-------|------|------|------|
| 1     | 3.359     | 215396   | 2519    | 0.000 |      |      |      |
| 2     | 6.321     | 450041   | 4171    | 0.000 |      |      |      |
| 3     | 17.117    | 2745     | 96      | 0.000 |      | V    |      |
| 4     | 17.292    | 1241     | 95      | 0.000 |      | V    |      |
| 5     | 17.567    | 1907     | 85      | 0.000 |      | V    |      |
| 6     | 20.668    | 632673   | 20225   | 0.000 |      |      |      |
| 7     | 21.338    | 1174748  | 22034   | 0.000 |      | V    |      |
| 8     | 23.503    | 24863802 | 762873  | 0.000 |      | V    |      |
| 9     | 24.239    | 7724167  | 264250  | 0.000 |      | V    |      |
| Total |           | 35066721 | 1076348 |       |      |      |      |

# Analysis Report

## <Sample Information>

Sample Name : NAK 49-21  
Sample ID : NAK 49-21  
Data Filename : NAK 49-21 Data1.lcd  
Method Filename : NAK 48-20.lcm  
Batch Filename :  
Vial # : 1-1  
Injection Volume : 20 uL  
Date Acquired : 02-Sep-22 5:25:43 PM  
Date Processed : 02-Sep-22 6:05:53 PM

Sample Type : Unknown  
Acquired by : System Administrator  
Processed by : System Administrator

## <Chromatogram>

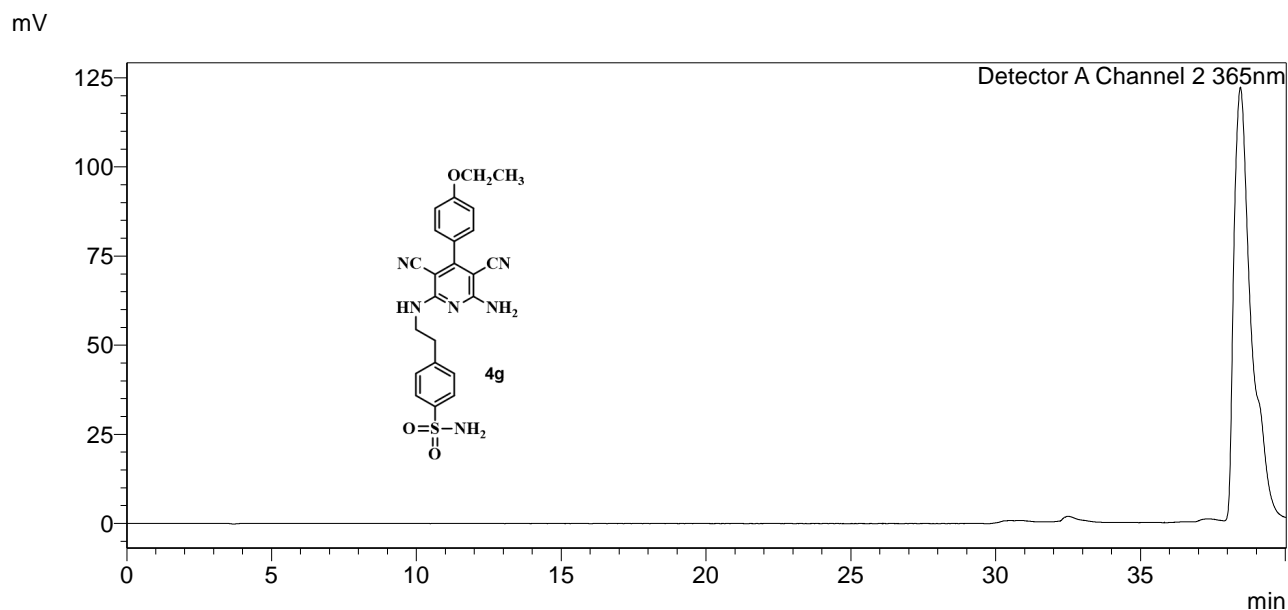

## Detector A Channel 2 365nm

| Peak# | Ret. Time | Area    | Height | Conc. | Unit | Mark | Name |
|-------|-----------|---------|--------|-------|------|------|------|
| 1     | 3.368     | 3574    | 153    | 0.000 |      | V    |      |
| 2     | 29.202    | 1116    | 83     | 0.000 |      | V    |      |
| 3     | 30.425    | 18348   | 819    | 0.000 |      |      |      |
| 4     | 30.501    | 8449    | 821    | 0.000 |      | V    |      |
| 5     | 30.857    | 32316   | 840    | 0.000 |      | V    |      |
| 6     | 31.492    | 2054    | 385    | 0.000 |      | V    |      |
| 7     | 31.592    | 1399    | 354    | 0.000 |      | V    |      |
| 8     | 31.691    | 2368    | 343    | 0.000 |      | V    |      |
| 9     | 31.933    | 4725    | 370    | 0.000 |      | V    |      |
| 10    | 32.508    | 77098   | 1804   | 0.000 |      | V    |      |
| 11    | 36.408    | 1533    | 102    | 0.000 |      |      |      |
| 12    | 37.233    | 10107   | 675    | 0.000 |      |      |      |
| 13    | 37.341    | 14396   | 666    | 0.000 |      | V    |      |
| 14    | 38.449    | 5018218 | 121378 | 0.000 |      |      |      |
| Total |           | 5195701 | 128794 |       |      |      |      |

# Analysis Report

## <Sample Information>

Sample Name : NAK 52-23  
Sample ID : NAK 52-23  
Data Filename : NAK 52-23 Data1.lcd  
Method Filename : NAK 48-20.lcm  
Batch Filename :  
Vial # : 1-1  
Injection Volume : 20 uL  
Date Acquired : 02-Sep-22 7:07:40 PM  
Date Processed : 02-Sep-22 7:47:51 PM

Sample Type : Unknown  
Acquired by : System Administrator  
Processed by : System Administrator

## <Chromatogram>

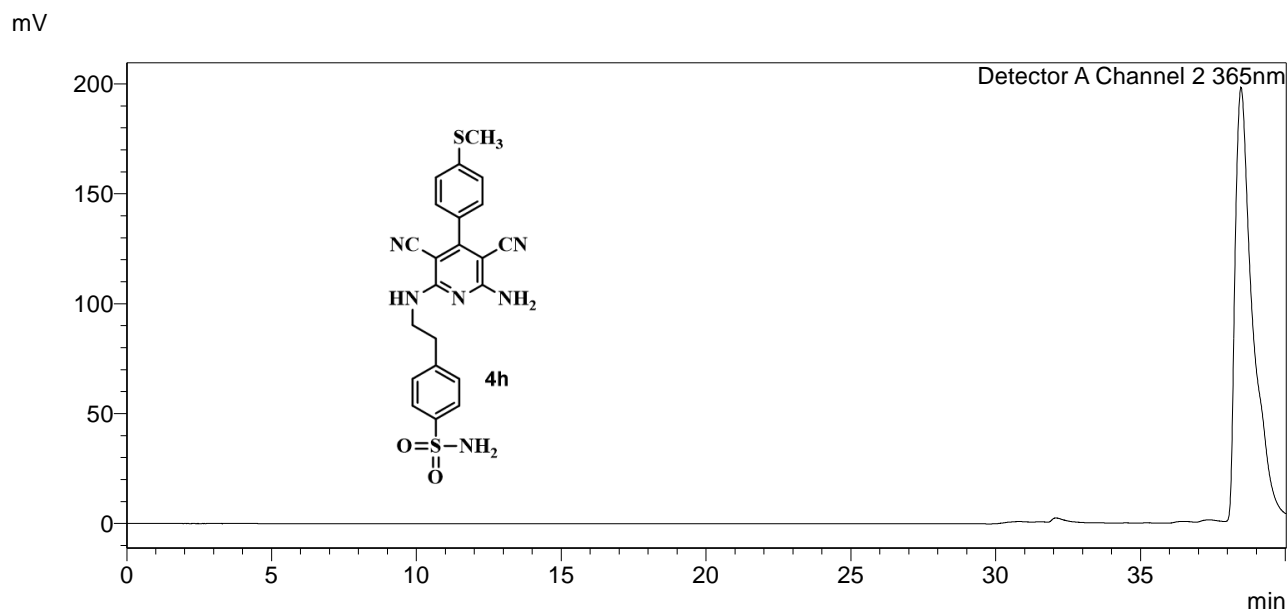



## Detector A Channel 2 365nm

| Peak# | Ret. Time | Area    | Height | Conc. | Unit | Mark | Name |
|-------|-----------|---------|--------|-------|------|------|------|
| 1     | 30.775    | 49070   | 975    | 0.000 |      | V    |      |
| 2     | 31.445    | 11236   | 739    | 0.000 |      | V    |      |
| 3     | 31.550    | 10551   | 713    | 0.000 |      | V    |      |
| 4     | 32.070    | 84046   | 2390   | 0.000 |      | V    |      |
| 5     | 36.455    | 11296   | 606    | 0.000 |      |      |      |
| 6     | 36.542    | 8227    | 569    | 0.000 |      | V    |      |
| 7     | 37.348    | 32613   | 970    | 0.000 |      | V    |      |
| 8     | 38.470    | 8178111 | 196627 | 0.000 |      |      |      |
| Total |           | 8385151 | 203589 |       |      |      |      |

SHIMADZU  
LabSolutions

## Analysis Report

## &lt;Sample Information&gt;

Sample Name : NAK 50-22  
Sample ID : NAK 50-22  
Data Filename : NAK 50-22 Data1.lcd  
Method Filename : NAK 48-20.lcm  
Batch Filename :  
Vial # : 1-1  
Injection Volume : 20 uL  
Date Acquired : 02-Sep-22 6:16:35 PM  
Date Processed : 02-Sep-22 6:56:45 PM

Sample Type : Unknown  
Acquired by : System Administrator  
Processed by : System Administrator

## &lt;Chromatogram&gt;

mV

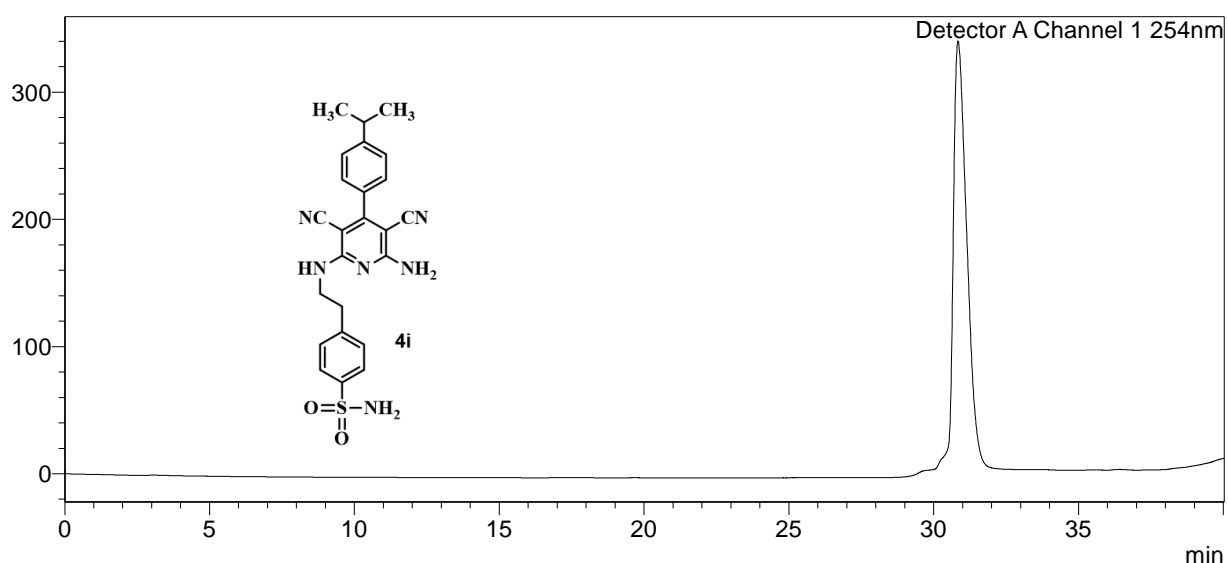

## &lt;Peak Table&gt;

Detector A Channel 1 254nm

| Peak# | Ret. Time | Area     | Height | Conc. | Unit | Mark | Name |
|-------|-----------|----------|--------|-------|------|------|------|
| 1     | 3.052     | 7908     | 213    | 0.000 |      |      |      |
| 2     | 30.841    | 11865219 | 340893 | 0.000 |      | S    |      |
| 3     | 33.703    | 9742     | 315    | 0.000 |      | TV   |      |
| 4     | 35.523    | 8641     | 259    | 0.000 |      |      |      |
| 5     | 36.431    | 18340    | 607    | 0.000 |      | V    |      |
| 6     | 37.467    | 1438     | 53     | 0.000 |      |      |      |
| Total |           | 11911288 | 342340 |       |      |      |      |

SHIMADZU  
LabSolutions

## Analysis Report

## &lt;Sample Information&gt;

Sample Name : NAK 55-24  
Sample ID : NAK 55-24  
Data Filename : NAK 55-24 Data1.lcd  
Method Filename : NAK 48-20.lcm  
Batch Filename :  
Vial # : 1-1  
Injection Volume : 20 uL  
Date Acquired : 02-Sep-22 8:29:29 PM  
Date Processed : 02-Sep-22 9:09:40 PM

Sample Type : Unknown  
Acquired by : System Administrator  
Processed by : System Administrator

## &lt;Chromatogram&gt;

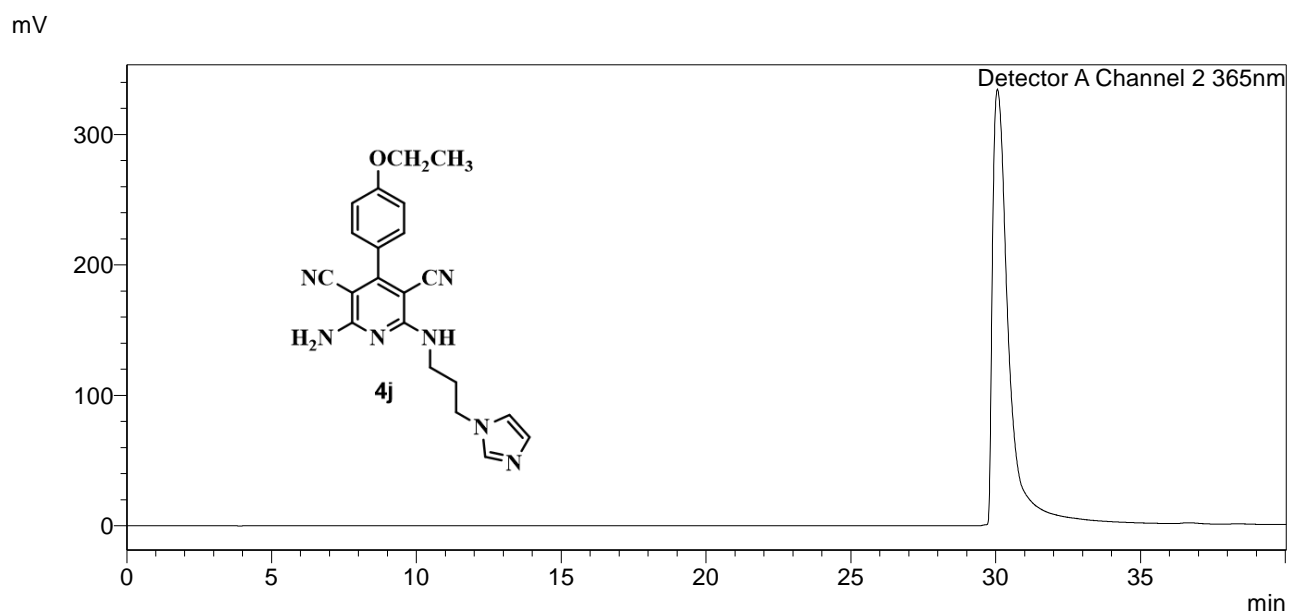

## Detector A Channel 2 365nm

| Peak# | Ret. Time | Area     | Height | Conc. | Unit | Mark | Name |
|-------|-----------|----------|--------|-------|------|------|------|
| 1     | 3.358     | 2092     | 141    | 0.000 |      | V    |      |
| 2     | 3.630     | 2061     | 190    | 0.000 |      | V    |      |
| 3     | 4.158     | 1193     | 123    | 0.000 |      |      |      |
| 4     | 30.060    | 13563798 | 334741 | 0.000 |      | S    |      |
| 5     | 36.258    | 1775     | 162    | 0.000 |      | TV   |      |
| 6     | 36.625    | 29734    | 803    | 0.000 |      | TV   |      |
| 7     | 38.367    | 16171    | 474    | 0.000 |      | T    |      |
| 8     | 39.125    | 1075     | 88     | 0.000 |      | TV   |      |
| Total |           | 13617900 | 336721 |       |      |      |      |
